# Supplementary material for: Monitoring structure and coordination chemistry of Co4O4-based oxygen evolution catalysts by nitrogen-14/-15 and cobalt-59 NMR spectroscopy
Source: Royal Society of Chemistry journal article supplement (doi:10.1039/d4dt01273a), 2024-01-01
Supplement: d4dt01273a1.pdf [file d4dt01273a1.pdf]

**Monitoring Structure and Coordination Chemistry of Co<sub>4</sub>O<sub>4</sub>-based Oxygen Evolution Catalysts by Nitrogen-14/-15 and Cobalt-59 NMR Spectroscopy**

## 1. Methods and materials

Benzonitrile (for synthesis), cobalt nitrate hexahydrate (98%), hydrogen peroxide (35%), potassium hexacyanocobaltate(III) (98%), pyridine (98%), {<sup>15</sup>N}pyridine (98 atom % <sup>15</sup>N), sodium acetate trihydrate (for analysis) and sodium persulfate (reagent grade, ≥98%) were purchased from Sigma-Aldrich, sodium tetraborate decahydrate (≥98%) from Carl Roth and tris(2,2'-bipyridyl)ruthenium(II) Chloride Hexahydrate (>98%) and 2,4,6-tri(4-pyridyl)-1,3,5-triazine (purified by sublimation, ≥97%) from TCI. All chemicals were used as received. Deuterated solvents were purchased from Deutero or Eurisotop.

Liquid NMR spectra were recorded either on a Bruker Ascend 400 spectrometer (9.4 T, <sup>1</sup>H at 400.13 MHz, <sup>13</sup>C at 100.61 MHz, <sup>15</sup>N at 40.54 MHz, <sup>59</sup>Co at 94.94 MHz), a Bruker Avance III 600 HD spectrometer (14.1 T, <sup>1</sup>H at 600.25 MHz, <sup>15</sup>N at 60.82 MHz) or on a JEOL ECX400 spectrometer (9.4 T, <sup>1</sup>H at 399.60 MHz, <sup>13</sup>C at 100.47 MHz, <sup>15</sup>N at 40.49 MHz, <sup>59</sup>Co at 93.78 MHz). Proton-1 and carbon-13 spectra were referenced against the residual solvent signal, cobalt-59 spectra were referenced against saturated K<sub>3</sub>[Co(CN)<sub>6</sub>] in D<sub>2</sub>O, and nitrogen-15 chemical shifts were referenced using the unified scale as recommended by IUPAC.<sup>1,2</sup>

IR spectra were recorded using a Thermo Scientific™ Nicolet™ iS™5 FT-IR spectrometer, as KBr pellets in transmission with a resolution of 1 cm<sup>-1</sup> and 16 scans per sample.

CHN analysis were performed on a Vario micro cube (Elementar Analysensysteme GmbH).

## 2. Co<sub>4</sub>O<sub>4</sub>(OAc)<sub>4</sub>Py<sub>4</sub> synthesis

The synthesis was done according to a modified literature procedure:<sup>3</sup>

In a 100 ml 3-neck round-bottom flask equipped with a reflux condenser 2.96 g (10.0 mmol) Co(NO<sub>3</sub>)<sub>2</sub> · 6 H<sub>2</sub>O and 2.81 g (20.2 mmol) NaOAc · 3 H<sub>2</sub>O were dissolved in 30 ml methanol and heated to reflux. Then 0.8 ml (9.7 mmol) pyridine were added to the stirred reaction mixture and subsequently 5 ml (58 mmol) 35 m% hydrogen peroxide solution were added dropwise using a dropping funnel over a period of 10 minutes. After 4h, the reaction mixture was cooled to room temperature. The aqueous phase was extracted with dichloromethane (3x 20 ml). The combined organic phase was dried over anhydrous MgSO<sub>4</sub> and filtered through a plug of celite. Evaporation of dichloromethane gave a olive green solid. Further purification was done by column chromatography (silica gel 60, gradient CH<sub>2</sub>Cl<sub>2</sub> → CH<sub>2</sub>Cl<sub>2</sub> : MeOH (95 : 5, V : V)) to yield pure Co<sub>4</sub>O<sub>4</sub>(OAc)<sub>4</sub>Py<sub>4</sub> I as green crystalline solid. Yield: 1.50 g (1.8 mmol, 73%).

Suitable crystals for single crystal analysis were obtained by vapour diffusion of diethyl ether into a concentrated solution of I in acetonitrile.

<sup>1</sup>H-NMR (300.13 MHz, acetornitrile-d<sub>3</sub>): δ = 8.37 (dd, J = 6.4, 1.4 Hz, 8H), 7.58 (tt, J = 7.6, 1.6 Hz, 4H), 7.09 (m, 8H), 1.98 (s, 12H) ppm.

<sup>13</sup>C (75.47 MHz, acetornitrile-d<sub>3</sub>): δ = 186.1, 153.3, 138.2, 124.6, 26.6 ppm.

<sup>59</sup>Co (94.94 MHz, acetornitrile-d<sub>3</sub>): δ = 11760 ppm.

<sup>1</sup>H-NMR (400.13 MHz, D<sub>2</sub>O): δ = 8.31 (m, 8H), 7.82 (m, 4H), 7.32 (m, 8H), 2.18 (s, 12H) ppm.

<sup>13</sup>C (100.61 MHz, D<sub>2</sub>O): δ = 188.9, 152.1, 139.0, 124.9, 25.7 ppm.

<sup>59</sup>Co (94.94 MHz, D<sub>2</sub>O): δ = 12066 ppm.

<sup>1</sup>H-NMR (300.13 MHz, MeOH-d<sub>4</sub>): δ = 8.43 (m, 8H), 7.67 (tt, J = 7.6, 1.4 Hz, 4H), 7.19 (m, 8H), 2.10 (s, 12H) ppm.

### Co<sub>4</sub>O<sub>4</sub>(OAc)<sub>4</sub>{<sup>15</sup>N}Py<sub>4</sub> {<sup>15</sup>N}I

The synthesis was done as described for the non-labelled cubane replacing pyridine with <sup>15</sup>N pyridine.

Yield: 484 mg (0.57 mmol, 77%)

Further purification was achieved by layering a solution of 100 mg {<sup>15</sup>N}I in 20 ml CH<sub>2</sub>Cl<sub>2</sub> with 10 ml *n*-hexane. After slow evaporation overnight the crystal formed were isolated, washed with *n*-hexane and dried. Typical yield: 50 mg needle-shaped crystals which were used for NMR-experiments.

<sup>1</sup>H-NMR (400.13 MHz, acetornitrile-d<sub>3</sub>): δ = 8.37 (m, 8H), 7.58 (m, 4H), 7.09 (m, 8H), 1.99 (s, 12H) ppm.

<sup>15</sup>N (40.54 MHz, acetornitrile-d<sub>3</sub>): δ = 244.6 ppm

<sup>59</sup>Co (94.94 MHz, acetornitrile-d<sub>3</sub>): δ = 11761 ppm.

<sup>1</sup>H-NMR (400.13 MHz, D<sub>2</sub>O): δ = 8.31 (m, 8H), 7.82 (m, 4H), 7.32 (m, 8H), 2.18 (s, 12H) ppm.

<sup>15</sup>N (40.54 MHz, D<sub>2</sub>O): δ = 233.3 ppm

<sup>59</sup>Co (94.94 MHz, D<sub>2</sub>O): δ = 12068 ppm.

<sup>1</sup>H-NMR (399.60 MHz, CD<sub>2</sub>Cl<sub>2</sub>): δ = 8.46 (m, 8H), 7.50 (m, 4H), 7.02 (m, 8H), 2.04 (s, 12H) ppm.

<sup>13</sup>C (100.47 MHz, CD<sub>2</sub>Cl<sub>2</sub>): δ = 186.4, 153.0, 137.3, 123.8, 26.9 ppm.

<sup>15</sup>N (40.49 MHz, CD<sub>2</sub>Cl<sub>2</sub>): δ = 243.3 ppm

<sup>59</sup>Co (93.78 MHz, CD<sub>2</sub>Cl<sub>2</sub>): δ = 11772 ppm.

### 3. Synthesis of Co<sub>4</sub>TPT

The synthesis was done according to a modified literature procedure:<sup>4</sup>

50.6 mg (59 μmol) Co<sub>4</sub>O<sub>4</sub>(OAc)<sub>4</sub>Py<sub>4</sub> I and 25.6 mg (79 μmol) 2,4,6-tri(4-pyridyl)-1,3,5-triazine (TPT) were placed in a 20 ml quartz ampule. 8 ml of benzonitrile were added, the suspension was ultrasonicated for 10 min and the suspension degassed by 3 freeze-pump-thaw cycles. The ampule was sealed under vacuum and placed in an oven preheated to 100 °C. After four days, the ampule was removed from the oven, opened (after cooling to room temperature), the red gel was transferred to a Soxhlet fumble and purified by Soxhlet extraction with methanol (24 h). Drying under reduced pressure (80°C) gave Co<sub>4</sub>TPT as dark red solid. Yield: 40.1 mg (42 μmol, 71 %).

CHN analysis, expected values: C: 40.36 H: 2.96 N:11.77  
experimental results: C: 35.62(4) H: 4.40(3) N: 10.49(4)  
C:N molar ratio: 3.96(1) expected 4.00

#### 4. Additional Characterisation

To rule out the impact of scalar coupling between the central Co atoms and the surrounding quadrupolar N ligand of pyridine, the molecular complex was analysed both using pyridine with  $^{15}\text{N}$  in natural abundance (0.37%) in  $\text{Co}_4\text{O}_4(\text{OAc})_4\text{Py}_4$  and enriched with  $^{15}\text{N}$  in  $\text{Co}_4\text{O}_4(\text{OAc})_4\{^{15}\text{N}\}\text{Py}_4$ . For ligand atoms with non-zero spin scalar coupling can contribute to line broadening. While in  $\text{Co}_4\text{O}_4(\text{OAc})_4\text{Py}_4$  it is supposed that no scalar coupling is observed due to the quadrupolar nature of  $^{14}\text{N}$  (99.63% natural abundance) causing quadrupolar relaxation, in  $\text{Co}_4\text{O}_4(\text{OAc})_4\{^{15}\text{N}\}\text{Py}_4$  scalar coupling between  $^{59}\text{Co}$  and  $^{15}\text{N}$  might contribute to line-broadening. However, when dissolved in  $\text{D}_2\text{O}$ , the  $^{59}\text{Co}$  NMR spectra of both complexes show similar linewidth (Figure S1). Thus, scalar coupling between  $^{59}\text{Co}$  and  $^{15}\text{N}$  does not significantly contribute to line-broadening. The impact of scalar coupling between  $^{59}\text{Co}$  and  $^{17}\text{O}$ , the only NMR active nuclei of oxygen, can be neglected due to the low natural abundance (0.038%) and the quadrupolar nature of  $^{17}\text{O}$  (spin of 5/2).<sup>5</sup>

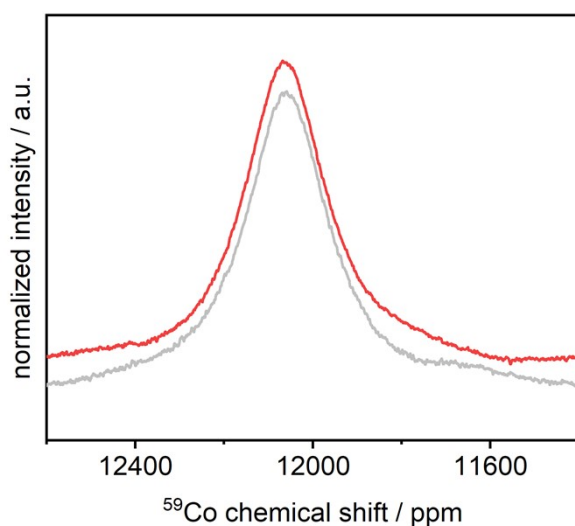

Figure S1. Comparison of  $^{59}\text{Co}$  NMR spectrum of  $\text{Co}_4\text{O}_4(\text{OAc})_4\text{Py}_4$  (grey) and  $\text{Co}_4\text{O}_4(\text{OAc})_4\{^{15}\text{N}\}\text{Py}_4$  (red) dissolved in  $\text{D}_2\text{O}$ .

## 5. Solid-state NMR spectroscopy

### 5.1. $^{15}\text{N}$ NMR spectroscopy

Solid-state  $^{15}\text{N}$  NMR measurements were performed on an Infinity<sub>plus</sub> spectrometer system (Agilent) operated at 7 T, equipped with a variable-temperature Chemagnetics-Varian 6 mm pencil CPMAS probe.  $^{15}\text{N}\{^1\text{H}\}$  static and MAS CP NMR spectra were recorded using a  $90^\circ$  pulse length of  $5.0\ \mu\text{s}$ . The cross-polarization contact times and relaxation delays were 3 ms and 10 s. The spectra were indirectly referenced to  $\text{CH}_3\text{NO}_2$  using solid  $^{15}\text{NH}_4\text{Cl}$  ( $\delta = -341.3\ \text{ppm}$ ). To convert these values to the liquid ammonia scale, 380.6 ppm must be added to them. All  $^{15}\text{N}$  chemical shifts are reported with respect to liquid  $\text{NH}_3$ . The numerical NMR parameters have been extracted from the experimentally obtained spectra using the WSolids1 program package,<sup>6</sup> DMFit and ssNake.<sup>7,8</sup>

**Table S 1:** Overview of experimental  $^{15}\text{N}$  NMR chemical shift tensor ( $\delta_{\text{ref}}(^{15}\text{NH}_3\ \text{liq.}) = 0\ \text{ppm}$ ).

| material / conditions                                                                     | $\delta_{\text{iso}} / \text{ppm}$ | $\delta_{\text{t}} / \text{ppm}$ | $\delta_{\text{r}} / \text{ppm}$ | $\delta_{\perp} / \text{ppm}$ |
|-------------------------------------------------------------------------------------------|------------------------------------|----------------------------------|----------------------------------|-------------------------------|
| $\{^{15}\text{N}\}$ -pyridine in $\text{D}_2\text{O}$                                     | 297                                |                                  |                                  |                               |
| $\text{Co}_4\text{O}_4(\text{OAc})_4\{^{15}\text{N}\}\text{Py}_4$ in $\text{D}_2\text{O}$ | 233                                |                                  |                                  |                               |
| $\text{Co}_4\text{O}_4(\text{OAc})_4\{^{15}\text{N}\}\text{Py}_4$ polycrystalline (MAS)   | 259(2)                             |                                  |                                  |                               |
|                                                                                           | 248(2)                             | 465(5)                           | 405(5)                           | -54(1)                        |
|                                                                                           | 239(3)                             |                                  |                                  |                               |

## 5.2. DFT calculations

The Gaussian 09.D.01 program package was used for geometry optimizations and NMR calculations. The TPSSH<sup>9</sup> and  $\omega$ B97XD<sup>10</sup> DFT hybrid functional and the def2tzvp and def2qzvp<sup>11</sup> basis sets were used. Geometry optimization was done at the very tight convergence criteria. The atom positions obtained from geometry optimisation of  $\text{Co}_4\text{O}_4\text{OAc}_4\text{Py}_4$  (*Pnm*, see section 6),  $\text{Co}_4\text{O}_4\text{OAc}_4\text{Py}_4$  (chloroform solvate, *Pnma*, CCDC 1280106<sup>12</sup>, hydrogen positions were optimized using the  $\omega$ B97XD/def2tzvp approximation) and pyridine are provided in **Table S2**, **Table S3** and **Table S4** respectively. The chloroform solvate of  $\text{Co}_4\text{O}_4\text{OAc}_4\text{Py}_4$  was used as a reference system in which slightly longer N $\cdots$ Co distances have been reported (**Table S5** - **Table S8**), to evaluate the impact of N $\cdots$ Co distances on the calculated <sup>15</sup>N chemical shift.

NMR calculations were carried out using the GIAO approach. All calculations were done using the PCM approximation with water as the solvent. This choice is arbitrary. The outcomes of the PCM approximation are not very sensitive to the value of the dielectric constant.<sup>13</sup> However, this correction is necessary in order to at least approximately consider the effect of the crystal field.

The chemical shift is a relative value. It is calculated based on the absolute shielding of the nucleus in the molecule of interest,  $\sigma$ , and in a reference compound,  $\sigma^{ref}$ . With a high level of accuracy:  $\delta \approx \sigma^{ref} - \sigma$ .<sup>14-16</sup> The numerical value of  $\sigma^{ref}$  depends on both the DFT functional and the basis set used. For the  $\omega$ B97XD/def2tzvp and  $\omega$ B97XD/def2qzvp approximations these values in the  $\text{CH}_3\text{NO}_2$  chemical shift scale are:  $\sigma^{ref} (^{15}\text{N}, \text{CH}_3\text{NO}_2, \omega\text{B97XD/def2tzvp}) = -143 \pm 3$  ppm and  $\sigma^{ref} (^{15}\text{N}, \text{CH}_3\text{NO}_2, \omega\text{B97XD/def2qzvp}) = -148 \pm 3$  ppm.<sup>17</sup> To convert these values to the  $\text{NH}_3$  chemical shift scale, 380.6 ppm must be added to them. Thus:  $\sigma^{ref} (^{15}\text{N}, \text{NH}_3, \omega\text{B97XD/def2tzvp}) = 238 \pm 3$  ppm and  $\sigma^{ref} (^{15}\text{N}, \text{NH}_3, \omega\text{B97XD/def2qzvp}) = 233 \pm 3$  ppm.

For elements beyond the third row of the periodic table, corrections for relativistic effects are necessary when calculating NMR parameters. Such corrections may be necessary even for light atoms due to the shielding effect of a neighboring heavy atom. Nevertheless, in coordination complexes involving pyridine, the heavy-atom effect on the <sup>15</sup>N shielding tensor is small, and the primary contribution to the calculation error arises from inaccuracies in determining the molecular structure.<sup>18</sup>

Table S2. DFT optimized atomic coordinates of Co<sub>4</sub>O<sub>4</sub>(OAc<sub>4</sub>)Py<sub>4</sub>

| Atom | x       | y        | z        | Atom | x       | y        | z        |
|------|---------|----------|----------|------|---------|----------|----------|
| N    | 5.99027 | 11.81245 | 8.43345  | H    | 8.92723 | 7.34122  | 9.97901  |
| N    | 5.99027 | 11.81245 | 5.08475  | H    | 8.92723 | 7.34122  | 3.53919  |
| N    | 5.30759 | 5.91912  | 6.7591   | C    | 1.57721 | 10.72812 | 3.31984  |
| N    | 2.28673 | 7.16314  | 6.7591   | C    | 1.57721 | 10.72812 | 10.19836 |
| Co   | 5.22463 | 10.0194  | 8.17247  | H    | 1.09768 | 11.60158 | 3.72856  |
| Co   | 5.22463 | 10.0194  | 5.34573  | H    | 1.09768 | 11.60158 | 9.78964  |
| Co   | 5.84912 | 7.8034   | 6.7591   | H    | 2.09248 | 10.99317 | 2.412    |
| Co   | 3.23423 | 8.87308  | 6.7591   | H    | 2.09248 | 10.99317 | 11.1062  |
| O    | 4.51494 | 8.32073  | 7.97907  | H    | 0.8346  | 9.97817  | 3.10529  |
| O    | 4.51494 | 8.32073  | 5.53913  | H    | 0.8346  | 9.97817  | 10.41291 |
| O    | 6.36514 | 9.60058  | 6.7591   | C    | 4.62259 | 3.96836  | 5.57819  |
| O    | 4.10299 | 10.53942 | 6.7591   | C    | 4.62259 | 3.96836  | 7.94001  |
| O    | 6.46011 | 9.28451  | 9.4833   | H    | 4.44634 | 3.47973  | 4.62789  |
| O    | 6.46011 | 9.28451  | 4.0349   | H    | 4.44634 | 3.47973  | 8.89031  |
| O    | 7.12272 | 7.49866  | 8.2394   | C    | 5.75442 | 14.15967 | 8.85026  |
| O    | 7.12272 | 7.49866  | 5.2788   | C    | 5.75442 | 14.15967 | 4.66794  |
| O    | 3.79353 | 10.41233 | 4.06704  | H    | 5.10798 | 14.99954 | 9.07302  |
| O    | 3.79353 | 10.41233 | 9.45116  | H    | 5.10798 | 14.99954 | 4.44518  |
| O    | 2.10086 | 9.56822  | 5.31401  | C    | 7.31638 | 11.97191 | 8.36153  |
| O    | 2.10086 | 9.56822  | 8.20419  | C    | 7.31638 | 11.97191 | 5.15667  |
| C    | 7.13292 | 8.23882  | 9.27386  | H    | 7.94446 | 11.10721 | 8.18635  |
| C    | 7.13292 | 8.23882  | 4.24434  | H    | 7.94446 | 11.10721 | 5.33185  |
| C    | 2.57115 | 10.18177 | 4.32334  | C    | 7.90223 | 13.21201 | 8.5053   |
| C    | 2.57115 | 10.18177 | 9.19486  | C    | 7.90223 | 13.21201 | 5.0129   |
| C    | 4.39705 | 3.29588  | 6.7591   | H    | 8.97768 | 13.31631 | 8.43164  |
| H    | 4.05269 | 2.26909  | 6.7591   | H    | 8.97768 | 13.31631 | 5.08656  |
| C    | 5.07517 | 5.27037  | 5.61894  | C    | 7.11258 | 14.32221 | 8.74384  |
| C    | 5.07517 | 5.27037  | 7.89926  | C    | 7.11258 | 14.32221 | 4.77436  |
| H    | 5.24919 | 5.78789  | 4.68364  | H    | 7.55902 | 15.30372 | 8.84495  |
| H    | 5.24919 | 5.78789  | 8.83456  | H    | 7.55902 | 15.30372 | 4.67325  |
| C    | 5.23269 | 12.88424 | 8.66353  | C    | 0.81974 | 4.82592  | 6.7591   |
| C    | 5.23269 | 12.88424 | 4.85467  | H    | 0.20841 | 3.93196  | 6.7591   |
| H    | 4.15823 | 12.75576 | 8.70724  | C    | 1.94191 | 6.57445  | 5.62694  |
| H    | 4.15823 | 12.75576 | 4.81096  | C    | 1.94191 | 6.57445  | 7.89126  |
| C    | 8.05611 | 7.8208   | 10.39264 | H    | 2.24323 | 7.03127  | 4.69238  |
| C    | 8.05611 | 7.8208   | 3.12556  | H    | 2.24323 | 7.03127  | 8.82582  |
| H    | 8.3569  | 8.68966  | 10.95347 | C    | 1.21675 | 5.40649  | 7.93304  |
| H    | 8.3569  | 8.68966  | 2.56473  | C    | 1.21675 | 5.40649  | 5.58516  |
| H    | 7.54288 | 7.13326  | 11.04365 | H    | 0.96319 | 4.95208  | 8.88283  |
| H    | 7.54288 | 7.13326  | 2.47455  | H    | 0.96319 | 4.95208  | 4.63537  |



**Table S3.** DFT optimized atomic coordinates of Co<sub>4</sub>O<sub>4</sub>(OAc<sub>4</sub>)Py<sub>2</sub>, chloroform solvate (CCDC 1280106,<sup>12</sup> *Pnma* (62), Cell: a 10.181(4)Å b 21.655(2)Å c 27.407(6)Å)

| Atom | x         | y         | z         | Atom | x         | y         | z         |
|------|-----------|-----------|-----------|------|-----------|-----------|-----------|
| Co   | 0.916052  | -1.409742 | -0.003225 | C    | 4.8875    | 2.074541  | -1.212917 |
| Co   | -0.895596 | -0.000034 | -1.396217 | C    | 3.536122  | 1.864447  | -1.196184 |
| Co   | -0.863785 | -0.000035 | 1.421579  | C    | -0.076657 | 3.599061  | 3.481068  |
| O    | -0.928388 | -1.191034 | 0.034547  | C    | -4.863628 | 1.245182  | 1.91237   |
| O    | 0.928903  | -0.000042 | -1.293835 | C    | -3.53338  | 1.178076  | 1.714163  |
| O    | 1.01448   | -0.000043 | 1.230096  | C    | -4.900658 | 1.180183  | -1.911626 |
| O    | 0.649596  | -2.717741 | -1.408585 | C    | -3.550213 | 1.134777  | -1.672361 |
| O    | -0.718394 | -1.446535 | -2.714126 | C    | -0.171831 | 3.646763  | -3.425226 |
| O    | 0.748975  | -2.683042 | 1.458396  | H    | -1.080809 | 4.025333  | 3.439893  |
| O    | -0.652581 | -1.474736 | 2.731036  | H    | 0.649215  | 4.389108  | 3.301452  |
| N    | 2.865216  | -1.686951 | -0.039601 | H    | 0.062582  | 3.185979  | 4.479108  |
| N    | -2.857908 | -0.000026 | -1.581244 | H    | 2.929728  | 1.862934  | -2.090298 |
| N    | -2.827447 | -0.000027 | 1.677564  | H    | 5.389145  | 2.231917  | -2.1578   |
| C    | -0.0542   | -2.522838 | -2.468189 | H    | 6.642461  | 2.11655   | -0.082157 |
| C    | -0.171862 | -3.646737 | -3.425228 | H    | 5.489547  | 1.775372  | 2.071313  |
| C    | 0.023058  | -2.516339 | 2.469566  | H    | 2.994217  | 1.472219  | 2.009771  |
| C    | -0.076688 | -3.599039 | 3.481066  | H    | 0.649226  | -4.389056 | 3.301487  |
| C    | 3.582261  | -1.645754 | 1.120258  | H    | 0.062478  | -3.185952 | 4.479114  |
| C    | 4.941365  | -1.82116  | 1.142083  | H    | 2.994204  | -1.472221 | 2.009769  |
| C    | 5.564477  | -1.996562 | -0.068556 | H    | 5.489532  | -1.775397 | 2.071312  |
| C    | 4.887482  | -2.074559 | -1.212918 | H    | 6.642443  | -2.116583 | -0.082159 |
| C    | 3.536106  | -1.864453 | -1.196185 | H    | 5.389126  | -2.231938 | -2.157801 |
| C    | -3.550223 | -1.134723 | -1.672361 | H    | 2.929712  | -1.862932 | -2.090298 |
| C    | -4.900668 | -1.180117 | -1.911626 | H    | -2.962473 | -2.036656 | -1.562294 |
| C    | -5.500467 | -0.000014 | -2.018405 | H    | -5.421529 | -2.121899 | -1.98974  |
| C    | -3.53339  | -1.178024 | 1.714163  | H    | -6.572055 | -0.000009 | -2.20813  |
| C    | -4.863639 | -1.245118 | 1.912369  | H    | -2.913209 | -2.059035 | 1.62054   |
| C    | -5.544321 | -0.000015 | 1.966462  | H    | -5.395095 | -2.183172 | 1.957494  |
| O    | -0.928378 | 1.191066  | 0.034547  | H    | -6.620454 | -0.000011 | 2.091872  |
| Co   | 0.916064  | 1.409758  | -0.003224 | H    | -2.913151 | 2.059048  | 1.620533  |
| O    | 0.649619  | 2.717759  | -1.408583 | H    | -5.395107 | 2.183222  | 1.957495  |
| C    | -0.054178 | 2.522862  | -2.468187 | H    | -0.361684 | -3.283115 | -4.432773 |
| O    | -0.718381 | 1.446565  | -2.714125 | H    | 0.719147  | -4.270369 | -3.406631 |
| O    | -0.652569 | 1.474764  | 2.731036  | H    | -1.023039 | -4.260556 | -3.121058 |
| C    | 0.023079  | 2.516361  | 2.469567  | H    | -1.080819 | -4.025355 | 3.439833  |
| O    | 0.748998  | 2.683058  | 1.458398  | H    | -2.962415 | 2.036673  | -1.562281 |
| N    | 2.86523   | 1.686949  | -0.0396   | H    | -5.421544 | 2.12195   | -1.989741 |
| C    | 3.582275  | 1.645746  | 1.120258  | H    | -0.361631 | 3.28314   | -4.432775 |
| C    | 4.941381  | 1.82114   | 1.142084  | H    | 0.719172  | 4.270404  | -3.406612 |
| C    | 5.564494  | 1.996538  | -0.068555 | H    | -1.023019 | 4.260575  | -3.121073 |

| Table | S4.       | DFT       | optimized | atomic | coordinates | of        | Py.      |
|-------|-----------|-----------|-----------|--------|-------------|-----------|----------|
| Atom  | x         | y         | z         | Atom   | x           | y         | z        |
| C     | 1.142559  | 0.719172  | -0.000001 | H      | 2.150471    | -1.178513 | 0.000002 |
| C     | 1.195157  | -0.670484 | 0         | H      | -0.000021   | -2.463056 | 0.000001 |
| C     | -0.000013 | -1.380496 | -0.000001 | H      | -2.150495   | -1.178472 | 0.000002 |
| C     | -1.195168 | -0.670464 | 0         | H      | -2.057699   | 1.301575  | 0.000003 |
| C     | -1.142546 | 0.719193  | -0.000001 | N      | 0.000013    | 1.416486  | 0        |
| H     | 2.057722  | 1.301539  | 0.000003  |        |             |           |          |

**Table S5.**  $^{15}\text{N}$  NMR chemical shift tensors of the selected structures calculated at the GIAO wB97XD/def2tzvp PCM = water approximation ( $\delta_{\text{ref}}(^{15}\text{NH}_3 \text{ liq.}) = 0 \text{ ppm}$ ).

| structure                                                                                               | N...Co distance, Å | $\delta_{\text{iso}}$ , ppm | $\delta_t$ , ppm | $\delta_r$ , ppm | $\delta_{\perp}$ , ppm |
|---------------------------------------------------------------------------------------------------------|--------------------|-----------------------------|------------------|------------------|------------------------|
| $\text{Co}_4\text{O}_4(\text{OAc}_4)\text{Py}_4$<br>(chloroform solvate<br>CCDC 1280106 <sup>12</sup> ) | 1.96911            | 284                         | 473              | 450              | -72                    |
|                                                                                                         | 1.97102            | 269                         | 459              | 426              | -77                    |
|                                                                                                         | 1.98028            | 284                         | 469              | 447              | -63                    |
|                                                                                                         | 1.96911            | 284                         | 473              | 450              | -72                    |
| $\text{Co}_4\text{O}_4(\text{OAc}_4)\text{Py}_4$                                                        | 1.96707            | 270                         | 450              | 438              | -78                    |
|                                                                                                         | 1.96707            | 270                         | 450              | 438              | -78                    |
|                                                                                                         | 1.96055            | 265                         | 446              | 431              | -80                    |
|                                                                                                         | 1.95490            | 260                         | 437              | 428              | -85                    |
| Pyridine                                                                                                |                    | 321                         | 605              | 419              | -61                    |

**Table S6.**  $^{15}\text{N}$  NMR shielding tensors of the selected structures calculated at the GIAO wB97XD/def2tzvp PCM = water approximation ( $\delta_{\text{ref}}(^{15}\text{NH}_3 \text{ liq.}) = 0 \text{ ppm}$ ).

| structure                                                                                               | N...Co distance, Å | $\sigma_{\text{iso}}$ , ppm | $\sigma_t$ , ppm | $\sigma_r$ , ppm | $\sigma_{\perp}$ , ppm |
|---------------------------------------------------------------------------------------------------------|--------------------|-----------------------------|------------------|------------------|------------------------|
| $\text{Co}_4\text{O}_4(\text{OAc}_4)\text{Py}_4$<br>(chloroform solvate<br>CCDC 1280106 <sup>12</sup> ) | 1.96911            | -45.7                       | -235.0           | -212.2           | 310.0                  |
|                                                                                                         | 1.97102            | -31.3                       | -221.3           | -187.6           | 315.1                  |
|                                                                                                         | 1.98028            | -46.1                       | -230.6           | -209.0           | 301.3                  |
|                                                                                                         | 1.96911            | -45.7                       | -235.0           | -212.2           | 310.0                  |
| $\text{Co}_4\text{O}_4(\text{OAc}_4)\text{Py}_4$                                                        | 1.96707            | -32.0                       | -211.9           | -200.0           | 315.8                  |
|                                                                                                         | 1.96707            | -32.0                       | -211.9           | -200.0           | 315.8                  |
|                                                                                                         | 1.96055            | -27.4                       | -207.6           | -192.6           | 317.9                  |
|                                                                                                         | 1.95490            | -22.0                       | -199.2           | -189.7           | 323.0                  |
| Pyridine                                                                                                |                    | -82.9                       | -366.7           | -180.9           | 298.8                  |

**Table S7.**  $^{15}\text{N}$  NMR chemical shift tensors of the selected structures calculated at the GIAO wb97XD/def2qzvp PCM = water approximation ( $\delta_{\text{ref}}(^{15}\text{NH}_3 \text{ liq.}) = 0 \text{ ppm}$ ).

| structure                                                                                               | N...Co distance, Å | $\delta_{\text{iso}}$ , ppm | $\delta_t$ , ppm | $\delta_r$ , ppm | $\delta_{\perp}$ , ppm |
|---------------------------------------------------------------------------------------------------------|--------------------|-----------------------------|------------------|------------------|------------------------|
| $\text{Co}_4\text{O}_4(\text{OAc}_4)\text{Py}_4$<br>(chloroform solvate<br>CCDC 1280106 <sup>12</sup> ) | 1.96911            | 286                         | 476              | 454              | -72                    |
|                                                                                                         | 1.97102            | 271                         | 462              | 429              | -78                    |
|                                                                                                         | 1.98028            | 286                         | 471              | 449              | -62                    |
|                                                                                                         | 1.96911            | 286                         | 476              | 454              | -72                    |
| $\text{Co}_4\text{O}_4(\text{OAc}_4)\text{Py}_4$                                                        | 1.96707            | 270                         | 454              | 441              | -84                    |
|                                                                                                         | 1.96707            | 270                         | 454              | 441              | -84                    |
|                                                                                                         | 1.96055            | 266                         | 480              | 436              | -86                    |
|                                                                                                         | 1.95490            | 260                         | 439              | 433              | -91                    |
| Pyridine                                                                                                |                    | 320                         | 605              | 420              | -64                    |

**Table S8.**  $^{15}\text{N}$  NMR shielding tensors of the selected structures calculated at the GIAO wb97XD/def2qzvp PCM = water approximation ( $\delta_{\text{ref}}(^{15}\text{NH}_3 \text{ liq.}) = 0 \text{ ppm}$ ).

| structure                                                                                               | N...Co distance, Å | $\sigma_{\text{iso}}$ , ppm | $\sigma_t$ , ppm | $\sigma_r$ , ppm | $\sigma_{\perp}$ , ppm |
|---------------------------------------------------------------------------------------------------------|--------------------|-----------------------------|------------------|------------------|------------------------|
| $\text{Co}_4\text{O}_4(\text{OAc}_4)\text{Py}_4$<br>(chloroform solvate<br>CCDC 1280106 <sup>12</sup> ) | 1.96911            | -52.8                       | -242.5           | -220.8           | 304.7                  |
|                                                                                                         | 1.97102            | -38.2                       | -229.0           | -196.1           | 310.6                  |
|                                                                                                         | 1.98028            | -53.2                       | -238.0           | -216.4           | 294.7                  |
|                                                                                                         | 1.96911            | -52.8                       | -242.5           | -220.8           | 304.7                  |
| $\text{Co}_4\text{O}_4(\text{OAc}_4)\text{Py}_4$                                                        | 1.96707            | -37.2                       | -220.7           | -207.9           | 317.1                  |
|                                                                                                         | 1.96707            | -37.2                       | -220.7           | -207.9           | 317.1                  |
|                                                                                                         | 1.96055            | -32.6                       | -214.0           | -203.0           | 319.1                  |
|                                                                                                         | 1.95490            | -27.1                       | -205.8           | -199.7           | 324.0                  |
| Pyridine                                                                                                |                    | -87.4                       | -371.7           | -187.3           | 296.8                  |

### 5.3. Fast MAS NMR spectroscopy

Solid-state NMR spectra were acquired using JEOL 600 MHz spectrometer (14.09 T) under MAS conditions with rotation rate of 70.0 and 62.5 kHz MAS (1.0 mm zirconia rotor) and Bruker Avance III 800 MHz (18.79 T) at 50 and 55 kHz MAS (1.3 mm zirconia rotor). Magic angle was calibrated using KBr external sample. All experiments were performed at room temperature of approximately 23°C without temperature regulation.

The  $^1\text{H}$ - $^{13}\text{C}$  and  $^1\text{H}$ - $^{14}\text{N}$  correlation spectra were acquired using double cross-polarisation (DCP) experiment and TRAPDOR-HMQC,<sup>19</sup> respectively, after 0.8  $\mu\text{s}$  ( $90^\circ$ )  $^1\text{H}$  excitation pulse. In the DCP  $^1\text{H}$ - $^{13}\text{C}$  we used 1.0 and 0.3 ms forward and backward CP mixing time, respectively. In the TRAPDOR-HMQC coherence transfer was assured by two 2ms high-power  $^{14}\text{N}$  pulses on resonance with 1<sup>st</sup> rotation sideband. The  $^1\text{H}$  and  $^{13}\text{C}$  1D spectra were acquired using spin-echo and CPMAS experiments, respectively. Repetition time of 2.0 and 0.5 s ( $1.5 \times T_1$ ) was used for  $\text{Co}_4\text{O}_4(\text{OAc})_4\text{Py}_4$  and  $\text{Co}_4\text{TPT}$ , respectively.

The  $^{59}\text{Co}$  spectra were acquired using single pulse experiment (pulse duration of 2.5 and 0.35  $\mu\text{s}$  for 600 and 800MHz spectrometer, resp.) with direct FID detection. Quadrupolar coupling (approx. 40 MHz) constant as well as pure isotropic  $^{59}\text{Co}$  chemical shift were obtained from linear dependence of the position of the isotropic-signal centre of gravity on the square of  $^{59}\text{Co}$  resonance frequency.<sup>20</sup> The isotropic signal was identified by measurement at different MAS rates. Zero asymmetry was assumed. Repetition delay was set to 0.5 s.

Chemical shifts were referenced using external sample of alanine ( $^1\text{H}$  at 1.237 ppm), adamantane ( $^{13}\text{C}$  at 37.8 ppm) and solution of  $\text{Co}(\text{acac})_3$  in chloroform ( $^{59}\text{Co}$  at 12500 ppm with respect to saturated  $\text{K}_3[\text{Co}(\text{CN})_6]$  in  $\text{D}_2\text{O}$ ),<sup>21</sup> the  $^{14}\text{N}$  spectra were referenced with respect to liquid  $\text{NH}_3$  by unified scale as recommended by IUPAC<sup>1,2</sup>

In case of  $^{14}\text{N}/^{15}\text{N}$  MAS NMR spectra of  $\text{Co}_4\text{O}_4(\text{OAc})_4\text{Py}_4$ , the comparison of  $^{15}\text{N}$  chemical shift ( $\delta_{15\text{N}} = 248.6$  ppm, mean value from Table S 1) and observed centre of gravity of the signal in the  $^{14}\text{N}$  projection of the TRAPDOR-HMQC spectra ( $\delta_{14\text{N}} = 576$  ppm (Figure 2D) gives second-order quadrupolar shift  $\delta_{iso}$ :

$$\delta_{iso} = \delta_{14\text{N}} - \delta_{15\text{N}} = 327 \text{ ppm}$$

which can be used for calculation of the quadrupolar product  $P_Q$ :

$$P_Q = \nu_{14\text{N}}^0 \sqrt{10^{-6} \times \frac{40}{3} \delta_{iso}^Q} = 2.86 \text{ MHz},$$

where  $\nu_{14\text{N}}^0 = 43.354$  MHz corresponds to Larmor frequency of  $^{14}\text{N}$  nucleus. Under an assumption of zero quadrupolar-coupling asymmetry, the value of the quadrupolar product is equivalent to the coupling constant  $C_Q$ .<sup>22</sup>

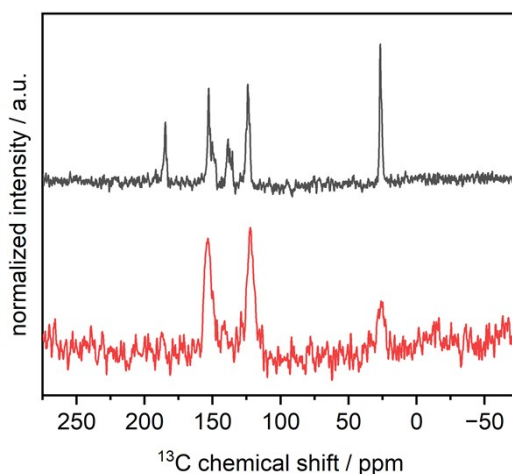

**Figure S2.** Solid-state  $^{13}\text{C}$  CPMAS spectra of  $\text{Co}_4\text{O}_4(\text{OAc})_4\text{Py}_4$  (grey) and  $\text{Co}_4\text{TPT}$  (red) acquired at  $B_0$  14.09 T under 62.5 and 70 kHz, respectively.

## 6. Photocatalytic OER and catalyst characterization

OER experiments were carried out in a home built 48 ml front irradiation quartz reactor,<sup>23,24</sup> equipped with a stirring bar and connected to a FireSting-O<sub>2</sub> Fiber-Optic Oxygen Meter (Robust Oxygen Probe OXROB10, both PyroScience GmbH) to measure the oxygen content in the gas phase. For a typical experiment using Co-TPT, ~10 mg of the solid catalyst were placed inside the reactor. The reactor was carefully evacuated and back-filled with Ar to remove air. Under a counterflow of Ar, 20 ml of a fresh, deaerated solution containing 5 mM of Na<sub>2</sub>S<sub>2</sub>O<sub>8</sub> and 1 mM Ru(bpy)<sub>3</sub>Cl<sub>2</sub> in a borate buffer (0.05 M, adjusted to pH 8 with sulfuric acid) were added. The reactor was sealed with rubber stoppers. The measurement was started under dark conditions and after approx. 180 s the reactor was irradiated using a 100 W Xe lamp (Siemens) equipped with a 420 nm bandpass filter, with a fixed distance of 10 cm between the light source and the reactor.

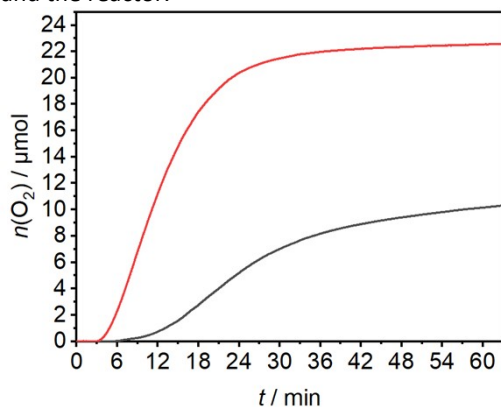

**Figure S3.** Comparison of OER activity for of Co<sub>4</sub>O<sub>4</sub>OAc<sub>4</sub>Py<sub>4</sub> (dark grey, 12 μmol) fresh Co-TPT (red, 8.7 μmol) in the presence of Ru(bpy)<sub>3</sub>Cl<sub>2</sub> (21 μmol) as a photosensitizer in aqueous borate buffer (pH 8, ~0.1 mmol Na<sub>2</sub>S<sub>2</sub>O<sub>8</sub>), 1 h.

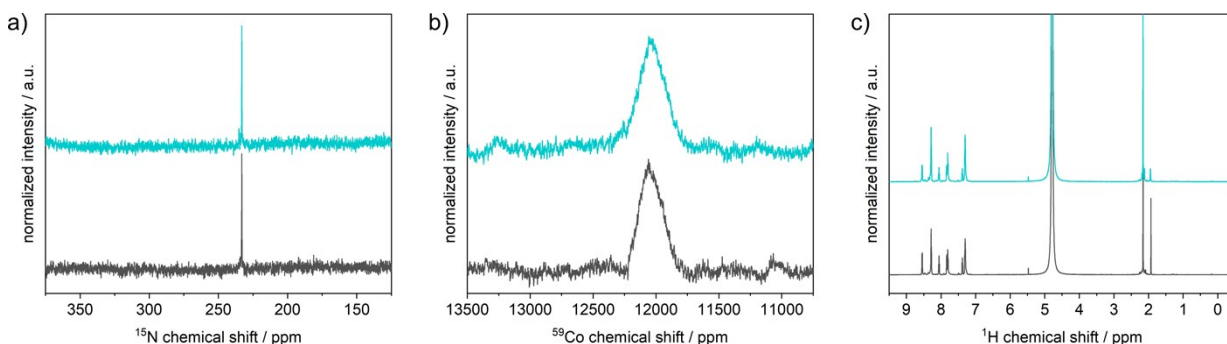

**Figure S4.** <sup>15</sup>N, <sup>59</sup>Co and <sup>1</sup>H NMR spectra of a solution of Co<sub>4</sub>O<sub>4</sub>(OAc)<sub>4</sub>(<sup>15</sup>N)Py<sub>4</sub> in D<sub>2</sub>O (0.05M Na<sub>2</sub>B<sub>2</sub>O<sub>7</sub>, adjusted with DCl to pH 7.9) containing 5 mM Ru(bpy)<sub>3</sub>Cl<sub>2</sub> and 30 mM Na<sub>2</sub>S<sub>2</sub>O<sub>8</sub> before (grey) and after photocatalysis (cyan, irradiation for 1h with a 100 W lamp).

**Table S9.** Overview of catalytic activity and comparison to literature. For each standard experiment at least two independent catalytic experiments were performed.

| material                                                        | $n_{\text{cubane}} / \mu\text{mol}$ | $n_{\text{O}_2} / \mu\text{mol}$ | yield / % | TON     | TOF                        | $R / \mu\text{mol/g/s}$ | ref       |
|-----------------------------------------------------------------|-------------------------------------|----------------------------------|-----------|---------|----------------------------|-------------------------|-----------|
| Co <sub>4</sub> O <sub>4</sub> OAc <sub>4</sub> Py <sub>4</sub> | 12.5±0.1                            | 14.7±2.5                         | 27±4      | 1.2±0.2 | (1.2±0.2)·10 <sup>-3</sup> | 1.5±0.1                 | this work |
|                                                                 | 0.332                               |                                  |           | 40±2    | 2.0·10 <sup>-2</sup> b     | --                      | 25 c      |
|                                                                 | 1.08                                | 2.5                              | 7         | 2.3     | 0.2·10 <sup>-3</sup>       |                         | 26 d      |
|                                                                 | 0.036                               | 5.0                              | 100       | 140     | 1.0·10 <sup>-3</sup>       |                         | 27 e      |
|                                                                 | 0.02 – 0.2                          |                                  |           |         | ~3·10 <sup>-2</sup>        |                         | 28 f      |
| CoTPT (av)                                                      | 8.7±0.3                             | 20.9±0.9                         | 37±3      | 2.4±0.1 | (3.2±0.1)·10 <sup>-3</sup> | 2.8±0.2                 | this work |
| 1 <sup>st</sup> cycle <sup>a</sup>                              | 8.4                                 | 20.0±0.9                         | 33±3      | 2.4±0.1 | (3.5±0.1)·10 <sup>-3</sup> | 3.0±0.2                 | this work |
| 2 <sup>nd</sup> cycle <sup>a</sup>                              | 8.4                                 | 15.9±0.7                         | 32±3      | 1.9±0.1 | (3.0±0.1)·10 <sup>-3</sup> | 3.0±0.2                 | this work |
| 3 <sup>rd</sup> cycle <sup>a</sup>                              | 8.4                                 | 24.1±1.1                         | 34±3      | 2.9±0.1 | (3.4±0.1)·10 <sup>-3</sup> | 3.0±0.2                 | this work |
| 4 <sup>th</sup> cycle <sup>a</sup>                              | 8.4                                 | 22.0±1.0                         | 37±3      | 2.6±0.1 | (3.4±0.1)·10 <sup>-3</sup> | 2.9±0.2                 | this work |

<sup>a</sup> for estimation of the error on recycling experiments the relative error  $\eta$  observed for CoTPT, was used to calculate the error bar for each point, even if this procedure overestimates the errors for some experimen<sup>29,30</sup>

<sup>b</sup> from dissolved oxygen determined using a Clark electrode; <sup>c</sup> pH 7, carbonate buffer, 250 W lamp; <sup>d</sup> pH 8, borate buffer, 450 nm LEDs; <sup>e</sup> pH 8, borate buffer, acetonitrile : water (1:1), 50 W halogen lamp; <sup>f</sup> pH 8, borate buffer LEDs

For recycling experiments, the solid catalyst was allowed to settle. Under a counterflow of Ar, the supernatant was carefully removed with a syringe. The supernatant was evaporated to dryness and redissolved in deionised water for ICP analysis of the amount of Co. 20 ml of a fresh, deaerated solution containing 5 mM of  $\text{Na}_2\text{S}_2\text{O}_8$  and 1 mM  $\text{Ru}(\text{bpy})_3\text{Cl}_2$  in a borate buffer (0.05 M, adjusted to pH 8 with sulfuric acid) were added, and the next cycle of OER was conducted. Over this series of 4 cycles, the TOF varied only slightly (Figure S5). To confirm the heterogeneous nature of the catalyst the liquid supernatant after each cycle was analysed by inductively coupled plasma optical emission spectroscopy. After each cycle small amounts of Co are leached in the supernatant (**Table S10**). Note that traces of decomposed cubane, their presence depending on the reaction conditions, have been reported to be catalytically inactive.<sup>26</sup> In line with those results, the IR spectrum of the spent catalyst confirms the stable nature of the framework, i.e. the cubane TPT coordinative bonds (Figure S6). After four cycles of catalysis the acetate ligands are completely replaced most likely by water and OH groups.<sup>4,31</sup> The absence of any additional bands in the 1200 – 1000  $\text{cm}^{-1}$  and 650 – 550  $\text{cm}^{-1}$  regions rule out the coordination of borate or sulfate (from  $\text{S}_2\text{O}_8^{2-}$ ) to the Co centres. This is further confirmed by the  $^{59}\text{Co}$  NMR investigations of the homogeneous complex, where we did not observe any indication of such coordination. The stability of the Co-cubane core after catalysis is further evidenced by the characteristic bands around 670, 640 ( $\nu_s(\text{Co}-\mu_3\text{O})$ ) and 580  $\text{cm}^{-1}$ , which has been defined as the cubane's markers.<sup>3</sup>

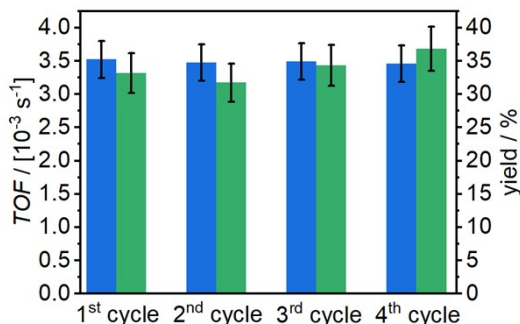

**Figure S5.** Catalytic activity over four cycles of catalysis using Co-TPT ( $\sim 8.4 \mu\text{mol}$ ) in the presence of  $\text{Ru}(\text{bpy})_3\text{Cl}_2$  ( $21 \mu\text{mol}$ ) as a photosensitizer in aqueous borate buffer (pH 8,  $\sim 0.1 \text{ mmol Na}_2\text{S}_2\text{O}_8$ ), 1 h. After each run, the solid was isolated by sedimentation and reused with a fresh solution of buffer solution containing  $\text{Ru}(\text{bpy})_3\text{Cl}_2$  and  $\text{Na}_2\text{S}_2\text{O}_8$ .

**Table S10.** Overview of leached amount of Co after each cycle into the supernatant as determined by ICP OES.

|                                  | after 1 <sup>st</sup> run | after 2 <sup>nd</sup> run | after 3 <sup>rd</sup> run | after 4 <sup>th</sup> run |
|----------------------------------|---------------------------|---------------------------|---------------------------|---------------------------|
| $\beta_{\text{Co}} / \text{ppm}$ | 3.6                       | 3.5                       | 4.2                       | 2.5                       |

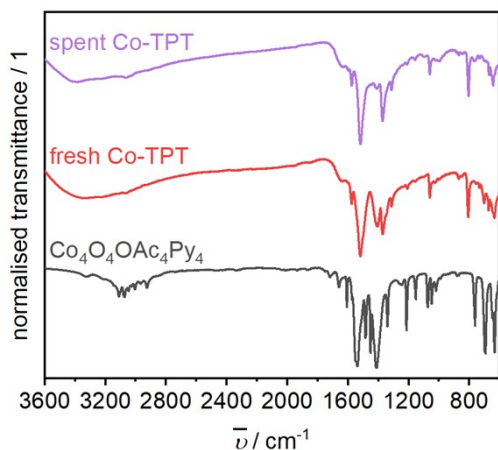

**Figure S6.** IR spectra of  $\text{Co}_4\text{O}_4(\text{OAc})_4\text{Py}_4$  (black), fresh Co-TPT (red) and spent Co-TPT after four cycles of photocatalysis (purple).

## 7. Single crystal data

### Summary of structure solution

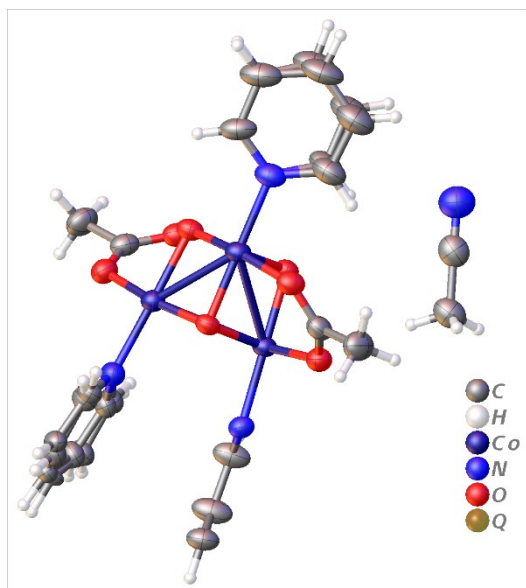

Single clear dark green needle-shaped crystals of **Co<sub>4</sub>O<sub>4</sub>OAc<sub>4</sub>Py<sub>4</sub>** were used as supplied. A suitable crystal with dimensions 0.25 × 0.04 × 0.04 mm<sup>3</sup> was selected and mounted on a XtaLAB Synergy R, DW system, HyPix-Arc 150 diffractometer. The crystal was kept at a steady  $T = 123.00(10)$  K during data collection. The structure was solved with the ShelXT 2018/2,<sup>32</sup> solution program using iterative methods and by using Olex2 1.5-alpha as the graphical interface.<sup>33</sup> The model was refined with olex2.refine 1.5-alpha using full matrix least squares minimisation on  $F^2$ .<sup>34</sup>

The unit cell was refined using CrysAlisPro 1.171.43.17a<sup>35</sup> on 30562 reflections, 50% of the observed reflections.

Data reduction, scaling and absorption corrections were performed using CrysAlisPro 1.171.43.17a (Rigaku OD, 2022). The final completeness is 99.97 % out to 75.92° in  $\theta$ . A gaussian absorption correction was performed using CrysAlisPro 1.171.43.17a. Numerical absorption correction based on gaussian integration over a multifaceted crystal model Empirical absorption correction using spherical harmonics, implemented in SCALE3 ABSPACK scaling algorithm. The absorption coefficient  $\mu$  of this material is 14.459 mm<sup>-1</sup> at this wavelength ( $\lambda = 1.54184\text{\AA}$ ) and the minimum and maximum transmissions are 0.152 and 0.845.

The structure was solved and the space group  $Pn\bar{m}$  (# 58) determined by the ShelXT 2018/2<sup>32</sup> structure solution program using iterative methods and refined by full matrix least squares minimisation on  $F^2$  using version of olex2.refine 1.5-alpha.<sup>34</sup> All non-hydrogen atoms were refined anisotropically. Hydrogen atom positions were calculated geometrically and refined using the riding model. Hydrogen atom positions were calculated geometrically and refined using the riding model.

*\_exptl\_absorpt\_process\_details:* CrysAlisPro 1.171.43.17a. Numerical absorption correction based on gaussian integration multifaceted crystal model. Empirical absorption correction using spherical harmonics, implemented in SCALE3 ABSPACK scaling algorithm.

The value of  $Z'$  is 0.5. This means that only half of the formula unit is present in the asymmetric unit, with the other half consisting of symmetry equivalent atoms.

|                                         |                                                                                |
|-----------------------------------------|--------------------------------------------------------------------------------|
| Compound                                | Co <sub>4</sub> O <sub>4</sub> (OAc) <sub>4</sub> Py <sub>4</sub>              |
| Formula                                 | C <sub>30</sub> H <sub>35</sub> Co <sub>4</sub> N <sub>5</sub> O <sub>12</sub> |
| D <sub>calc.</sub> / g cm <sup>-3</sup> | 1.615                                                                          |
| $\mu$ /mm <sup>-1</sup>                 | 14.459                                                                         |
| Formula Weight                          | 893.372                                                                        |
| Colour                                  | clear dark green                                                               |
| Shape                                   | needle-shaped                                                                  |
| Size/mm <sup>3</sup>                    | 0.25×0.04×0.04                                                                 |
| T/K                                     | 123.00(10)                                                                     |
| Crystal System                          | orthorhombic                                                                   |
| Space Group                             | Pn $\bar{m}$                                                                   |
| a/ $\text{\AA}$                         | 19.6668(2)                                                                     |
| b/ $\text{\AA}$                         | 13.8232(1)                                                                     |
| c/ $\text{\AA}$                         | 13.5182(1)                                                                     |
| $\alpha$ /°                             | 90                                                                             |
| $\beta$ /°                              | 90                                                                             |
| $\gamma$ /°                             | 90                                                                             |
| V/ $\text{\AA}^3$                       | 3675.03(5)                                                                     |
| Z                                       | 4                                                                              |
| Z'                                      | 0.5                                                                            |
| Wavelength/ $\text{\AA}$                | 1.54184                                                                        |
| Radiation type                          | Cu K $\alpha$                                                                  |
| $Q_{\min}$ /°                           | 3.91                                                                           |
| $Q_{\max}$ /°                           | 75.92                                                                          |
| Measured Refl's.                        | 60800                                                                          |
| Indep't Refl's                          | 3938                                                                           |
| Refl's $I \geq 2 \sigma(I)$             | 3602                                                                           |
| $R_{\text{int}}$                        | 0.0438                                                                         |
| Parameters                              | 341                                                                            |
| Restraints                              | 416                                                                            |
| Largest Peak                            | 0.5862                                                                         |
| Deepest Hole                            | -0.2986                                                                        |
| Goof                                    | 1.0400                                                                         |
| wR <sub>2</sub> (all data)              | 0.0914                                                                         |
| wR <sub>2</sub>                         | 0.0893                                                                         |
| R <sub>1</sub> (all data)               | 0.0351                                                                         |
| R <sub>1</sub>                          | 0.0321                                                                         |



A Hirshfeld-Atom-Refinement (HAR) using the software *NoSpherA2*<sup>36</sup> was used to obtain non-spherical atomic formfactors for all but hydrogen atoms in the structure. Modelling hydrogen atoms anisotropically and with a free distance was not possible for a converged model. We attribute this to the disorder and the coordinated pyridyl groups. Generally, HAR improved the agreement between the measured and calculated data by 0.62% in R1 and 1.35% in wR2, substantially improving the model for this metalorganic compound.

A solvent mask was calculated, and 66 electrons were found in a volume of 216 Å<sup>3</sup>, which were attributed to the presence of approximately one molecule of acetonitrile (88 electrons) per asymmetric unit. The solvent molecule was heavily disordered and could not be modelled properly without inflicting the part of interest in the crystallographic structure.

**Table S11.** Fractional Atomic Coordinates ( $\times 10^4$ ) and Equivalent Isotropic Displacement Parameters ( $\text{\AA}^2 \times 10^3$ ) for  $\text{Co}_4\text{O}_4\text{OAc}_4\text{Py}_4$ .  $U_{\text{eq}}$  is defined as 1/3 of the trace of the orthogonalised  $U_{ij}$ .

| Atom             | x           | y           | z          | $U_{\text{eq}}$ |
|------------------|-------------|-------------|------------|-----------------|
| Co <sup>01</sup> | 2656.67(17) | 7248.0(2)   | 6045.8(2)  | 33.65(11)       |
| Co <sup>02</sup> | 2974.2(2)   | 5645.0(3)   | 5000       | 31.94(12)       |
| Co <sup>03</sup> | 1644.6(2)   | 6418.7(3)   | 5000       | 33.76(12)       |
| O <sup>004</sup> | 2296.0(7)   | 6017.9(10)  | 5903.5(10) | 33.2(3)         |
| O <sup>005</sup> | 3237.0(10)  | 6944.7(13)  | 5000       | 32.3(4)         |
| O <sup>006</sup> | 2086.4(11)  | 7623.6(14)  | 5000       | 36.3(4)         |
| O <sup>007</sup> | 3285.6(8)   | 6717.6(10)  | 7015.0(11) | 40.6(3)         |
| O <sup>008</sup> | 3622.5(8)   | 5424.0(10)  | 6094.7(11) | 40.5(3)         |
| O <sup>009</sup> | 1929.1(8)   | 7534.6(10)  | 3008.8(11) | 40.8(3)         |
| O <sup>00A</sup> | 1065.9(8)   | 6920.9(11)  | 3931.5(12) | 42.9(4)         |
| N <sup>00B</sup> | 2697.8(13)  | 4284.6(17)  | 5000       | 34.6(5)         |
| C <sup>00E</sup> | 3625.2(11)  | 5960.0(15)  | 6858.8(17) | 39.8(5)         |
| C <sup>00F</sup> | 1307.8(12)  | 7366.7(15)  | 3197.4(17) | 41.7(5)         |
| N <sup>00G</sup> | 5265(2)     | 8086(3)     | 5000       | 70.7(9)         |
| C <sup>00H</sup> | 2236.7(19)  | 2388(2)     | 5000       | 46.7(8)         |
| C <sup>00I</sup> | 5227(2)     | 7262(3)     | 5000       | 54.7(9)         |
| C <sup>00J</sup> | 2581.9(15)  | 3809.1(17)  | 4157.0(18) | 51.5(6)         |
| C <sup>00K</sup> | 2659.4(16)  | 9323.8(16)  | 6411.7(19) | 53.4(6)         |
| C <sup>00L</sup> | 4091.9(14)  | 5657.1(19)  | 7689(2)    | 57.3(7)         |
| C <sup>00M</sup> | 5178(2)     | 6210(3)     | 5000       | 55.9(9)         |
| C <sup>00N</sup> | 799.2(14)   | 7754.4(18)  | 2459(2)    | 56.3(7)         |
| C <sup>00O</sup> | 2347.9(17)  | 2872.4(18)  | 4127(2)    | 58.7(7)         |
| C <sup>00Q</sup> | 2930.6(19)  | 10239.4(19) | 6547(2)    | 67.1(8)         |
| C <sup>00R</sup> | 3701(5)     | 8726(8)     | 6011(8)    | 54.5(18)        |
| C <sup>00T</sup> | 3561(6)     | 10429(8)    | 6322(9)    | 69.1(19)        |
| C <sup>00W</sup> | 3981(5)     | 9649(6)     | 6056(8)    | 66.1(17)        |
| N <sup>00E</sup> | 3045.0(11)  | 8544.6(13)  | 6238.0(14) | 44.4(4)         |
| C <sup>4</sup>   | 3741(5)     | 8605(6)     | 6332(7)    | 58.1(17)        |
| C <sup>00X</sup> | 4053(4)     | 9485(5)     | 6505(8)    | 74.2(17)        |
| C <sup>00U</sup> | 3663(5)     | 10292(7)    | 6588(8)    | 72.1(18)        |
| N <sup>2</sup>   | 1165.1(13)  | 5180.9(19)  | 5000       | 42.7(6)         |
| C <sup>3</sup>   | 888(9)      | 4868(11)    | 5823(10)   | 41(2)           |
| C <sup>1</sup>   | 485(6)      | 4043(8)     | 5831(8)    | 37(2)           |
| C <sup>5</sup>   | 384(11)     | 3531(14)    | 5000       | 36(2)           |
| C <sup>6</sup>   | 690(8)      | 3823(11)    | 4132(10)   | 43(2)           |
| C <sup>7</sup>   | 1080(9)     | 4658(10)    | 4152(10)   | 42(2)           |
| C <sup>3a</sup>  | 832(9)      | 4763(12)    | 5681(11)   | 43(2)           |
| C <sup>1a</sup>  | 470(7)      | 3841(10)    | 5543(10)   | 44(2)           |
| C <sup>5a</sup>  | 448(6)      | 3442(8)     | 4775(7)    | 31(2)           |
| C <sup>6a</sup>  | 803(7)      | 3851(10)    | 3920(10)   | 41.3(19)        |
| C <sup>7a</sup>  | 1152(9)     | 4731(11)    | 4019(11)   | 41(2)           |

**Table S12.** Anisotropic Displacement Parameters ( $\times 10^4$ ) for  $\text{Co}_4\text{O}_4\text{OAc}_4\text{Py}_4$ . The anisotropic displacement factor exponent takes the form:  $-2\pi^2[h^2a^{*2} \times U_{11} + \dots + 2hka^* \times b^* \times U_{12}]$ .

| Atom | U11      | U22       | U33       | U23       | U13       | U12       |
|------|----------|-----------|-----------|-----------|-----------|-----------|
| Co01 | 41.1(2)  | 25.39(17) | 34.43(18) | -2.29(12) | 0.14(13)  | -1.40(12) |
| Co02 | 35.6(2)  | 24.7(2)   | 35.4(2)   | -1.73(17) | -0        | 0         |
| Co03 | 35.4(2)  | 27.8(2)   | 38.0(2)   | -0.55(17) | -0        | 0         |
| O004 | 37.2(7)  | 26.3(6)   | 36.1(7)   | -5.5(5)   | -1.1(6)   | 1.6(5)    |
| O005 | 34.2(10) | 24.6(9)   | 38.0(10)  | -5.1(8)   | -0        | 0         |
| O006 | 43.6(11) | 27.8(9)   | 37.5(11)  | -5.5(8)   | -0        | 0         |
| O007 | 47.3(8)  | 35.0(7)   | 39.5(8)   | -3.4(6)   | -4.6(7)   | -0.9(6)   |
| O008 | 39.8(8)  | 33.7(7)   | 47.9(8)   | -0.4(6)   | -2.4(7)   | 0.5(6)    |
| O009 | 50.7(9)  | 33.0(7)   | 38.7(8)   | 1.8(6)    | -3.2(7)   | 1.4(6)    |
| O00A | 42.8(8)  | 37.0(8)   | 48.7(9)   | 4.0(6)    | -3.3(7)   | 0.1(7)    |
| N00B | 39.8(13) | 28.8(11)  | 35.0(12)  | 2.4(10)   | -0        | 0         |
| C00E | 39.4(11) | 36.0(10)  | 43.9(11)  | -7.4(9)   | -4.8(9)   | 2.4(9)    |
| C00F | 52.0(13) | 30.5(10)  | 42.5(12)  | 4.8(9)    | -6.0(10)  | -1.5(9)   |
| N00G | 80(2)    | 61(2)     | 71(2)     | 1.3(19)   | -0        | 0         |
| C00H | 64(2)    | 30.3(15)  | 45.2(18)  | -6.0(14)  | -0        | 0         |
| C00I | 57(2)    | 62(2)     | 44.6(19)  | -6.0(17)  | -0        | 0         |
| C00J | 83.0(18) | 38.6(12)  | 33.0(11)  | -14.5(12) | 0.5(11)   | -0.3(9)   |
| C00K | 83.9(18) | 29.0(10)  | 47.4(13)  | 1.2(10)   | 4.1(12)   | -0.7(9)   |
| C00L | 55.7(15) | 51.8(14)  | 64.6(16)  | -0.4(12)  | -20.2(13) | -0.1(12)  |
| C00M | 63(2)    | 56(2)     | 48.6(19)  | -12.7(18) | -0        | 0         |
| C00N | 59.8(16) | 48.1(13)  | 60.9(16)  | 12.6(11)  | -13.0(13) | 5.5(11)   |
| C00O | 98(2)    | 39.5(13)  | 38.8(13)  | -16.3(13) | 2.6(13)   | -3.9(10)  |
| C00Q | 108(2)   | 35.4(12)  | 58.2(16)  | -7.2(12)  | 8.2(14)   | -3.0(10)  |
| C00R | 64(3)    | 44(3)     | 55(4)     | -20.0(18) | 0(2)      | -7(2)     |
| C00T | 103(3)   | 38(3)     | 66(4)     | -19.4(17) | 3(2)      | -5(2)     |
| C00W | 83(3)    | 50(3)     | 65(4)     | -25.6(17) | 2(2)      | -7(2)     |
| N00E | 59.6(12) | 33.6(9)   | 40.1(10)  | -7.5(8)   | 2.3(9)    | -4.0(7)   |
| C4   | 69(3)    | 45(3)     | 60(4)     | -19.3(18) | 4(2)      | -4(2)     |
| C00X | 87(3)    | 57(3)     | 79(4)     | -27.0(19) | -1(2)     | -3(2)     |
| C00U | 107(4)   | 41(3)     | 68(4)     | -27(2)    | 0(2)      | -7(2)     |
| N2   | 36.7(13) | 34.8(12)  | 56.6(15)  | -0.6(10)  | -0        | 0         |
| C3   | 38(4)    | 32(4)     | 55(4)     | -4(2)     | 2.2(18)   | -0.9(17)  |
| C1   | 32(4)    | 28(4)     | 51(4)     | 0(2)      | 3.0(18)   | -2.2(16)  |
| C5   | 28(4)    | 30(4)     | 48(5)     | -3(2)     | -0        | 0         |
| C6   | 35(4)    | 42(3)     | 52(4)     | -7(2)     | 2.8(17)   | -1.6(16)  |
| C7   | 32(4)    | 40(3)     | 55(4)     | -4(2)     | 2.1(18)   | -0.6(17)  |
| C3a  | 38(4)    | 37(4)     | 53(4)     | -4(2)     | 2(2)      | -2(2)     |
| C1a  | 35(4)    | 41(5)     | 57(5)     | -4(3)     | 2(2)      | 5(2)      |
| C5a  | 30(4)    | 18(3)     | 44(5)     | -7(2)     | -2(2)     | 4(2)      |
| C6a  | 35(4)    | 39(3)     | 50(4)     | -9(2)     | 4(2)      | -1(2)     |
| C7a  | 33(4)    | 38(4)     | 53(4)     | -6(2)     | 0(2)      | -5(2)     |

**Table S13.** Bond Lengths in Å for Co<sub>4</sub>O<sub>4</sub>OAc<sub>4</sub>Py<sub>4</sub>.

| Atom | Atom  | Length/Å   | Atom | Atom  | Length/Å  |
|------|-------|------------|------|-------|-----------|
| Co01 | Co011 | 2.8275(7)  | C00H | C00O  | 1.374(3)  |
| Co01 | Co021 | 2.7016(5)  | C00H | C00O1 | 1.374(3)  |
| Co01 | Co031 | 2.6971(5)  | C00I | C00M  | 1.458(5)  |
| Co01 | O004  | 1.8525(13) | C00J | C00O  | 1.375(3)  |
| Co01 | O0051 | 1.8647(13) | C00K | C00Q  | 1.386(4)  |
| Co01 | O0061 | 1.8778(15) | C00K | N00E  | 1.338(3)  |
| Co01 | O007  | 1.9452(15) | C00Q | C00T  | 1.303(13) |
| Co01 | O0091 | 1.9590(15) | C00Q | C00U  | 1.443(11) |
| Co01 | N00E  | 1.9654(19) | C00R | C00W  | 1.391(10) |
| Co02 | Co03  | 2.8251(6)  | C00R | N00E  | 1.350(11) |
| Co02 | O004  | 1.8806(14) | C00T | C00W  | 1.405(13) |
| Co02 | O0041 | 1.8806(14) | N00E | C4    | 1.376(10) |
| Co02 | O005  | 1.8694(18) | C4   | C00X  | 1.383(9)  |
| Co02 | O0081 | 1.9771(16) | C00X | C00U  | 1.358(11) |
| Co02 | O008  | 1.9771(16) | N2   | C31   | 1.312(12) |
| Co02 | N00B  | 1.958(2)   | N2   | C3    | 1.312(12) |
| Co03 | O004  | 1.8547(14) | N2   | C7    | 1.366(12) |
| Co03 | O0041 | 1.8547(14) | N2   | C71   | 1.366(12) |
| Co03 | O006  | 1.879(2)   | N2   | C3a1  | 1.269(14) |
| Co03 | O00A  | 1.9656(16) | N2   | C3a   | 1.269(14) |
| Co03 | O00A1 | 1.9656(16) | N2   | C7a1  | 1.465(14) |
| Co03 | N2    | 1.954(3)   | N2   | C7a   | 1.465(14) |
| O007 | C00E  | 1.260(3)   | C3   | C1    | 1.388(11) |
| O008 | C00E  | 1.271(3)   | C1   | C51   | 1.343(11) |
| O009 | C00F  | 1.270(3)   | C5   | C6    | 1.379(11) |
| O00A | C00F  | 1.261(3)   | C5   | C61   | 1.379(11) |
| N00B | C00J  | 1.335(3)   | C6   | C7    | 1.385(11) |
| N00B | C00J1 | 1.335(3)   | C3a  | C1a   | 1.472(15) |
| C00E | C00L  | 1.509(3)   | C1a  | C5a   | 1.177(15) |
| C00F | C00N  | 1.511(3)   | C5a  | C6a   | 1.464(13) |
| N00G | C00I  | 1.141(5)   | C6a  | C7a   | 1.404(14) |

Table S14. Bond Angles in ° for Co4O4OAc4Py4.

| Atom  | Atom | Atom  | Angle/°    | Atom  | Atom | Atom  | Angle/°    |
|-------|------|-------|------------|-------|------|-------|------------|
| Co031 | Co01 | Co021 | 63.106(14) | Co02  | Co03 | Co011 | 58.525(13) |
| O004  | Co01 | Co021 | 44.05(4)   | O0041 | Co03 | Co011 | 43.29(4)   |
| O004  | Co01 | Co031 | 43.35(4)   | O004  | Co03 | Co01  | 43.29(4)   |
| O0051 | Co01 | Co021 | 43.72(6)   | O004  | Co03 | Co011 | 87.85(4)   |
| O0051 | Co01 | Co031 | 87.63(5)   | O0041 | Co03 | Co01  | 87.85(4)   |
| O0051 | Co01 | O004  | 87.09(7)   | O0041 | Co03 | Co02  | 41.20(4)   |
| O0061 | Co01 | Co021 | 88.33(5)   | O004  | Co03 | Co02  | 41.20(4)   |
| O0061 | Co01 | Co031 | 44.12(6)   | O004  | Co03 | O0041 | 82.38(9)   |
| O0061 | Co01 | O004  | 86.96(7)   | O006  | Co03 | Co011 | 44.10(4)   |
| O0061 | Co01 | O0051 | 81.77(7)   | O006  | Co03 | Co01  | 44.10(4)   |
| O007  | Co01 | Co021 | 84.05(5)   | O006  | Co03 | Co02  | 84.70(7)   |
| O007  | Co01 | Co031 | 131.46(4)  | O006  | Co03 | O0041 | 86.87(6)   |
| O007  | Co01 | O004  | 88.13(6)   | O006  | Co03 | O004  | 86.87(6)   |
| O007  | Co01 | O0051 | 92.11(7)   | O00A1 | Co03 | Co011 | 131.48(5)  |
| O007  | Co01 | O0061 | 172.33(7)  | O00A  | Co03 | Co01  | 131.48(5)  |
| O0091 | Co01 | Co021 | 132.54(5)  | O00A  | Co03 | Co011 | 83.80(5)   |
| O0091 | Co01 | Co031 | 83.62(5)   | O00A1 | Co03 | Co01  | 83.80(5)   |
| O0091 | Co01 | O004  | 88.49(6)   | O00A  | Co03 | Co02  | 132.04(5)  |
| O0091 | Co01 | O0051 | 170.80(7)  | O00A1 | Co03 | Co02  | 132.04(5)  |
| O0091 | Co01 | O0061 | 89.94(7)   | O00A  | Co03 | O0041 | 91.23(6)   |
| O0091 | Co01 | O007  | 95.81(7)   | O00A  | Co03 | O004  | 171.64(7)  |
| N00E  | Co01 | Co021 | 136.66(6)  | O00A1 | Co03 | O004  | 91.23(6)   |
| N00E  | Co01 | Co031 | 138.04(6)  | O00A1 | Co03 | O0041 | 171.64(7)  |
| N00E  | Co01 | O004  | 178.31(7)  | O00A1 | Co03 | O006  | 87.40(7)   |
| N00E  | Co01 | O0051 | 93.87(8)   | O00A  | Co03 | O006  | 87.40(7)   |
| N00E  | Co01 | O0061 | 94.56(9)   | O00A1 | Co03 | O00A  | 94.59(9)   |
| N00E  | Co01 | O007  | 90.44(7)   | N2    | Co03 | Co01  | 136.76(5)  |
| N00E  | Co01 | O0091 | 90.76(7)   | N2    | Co03 | Co011 | 136.76(5)  |
| Co01  | Co02 | Co011 | 63.107(16) | N2    | Co03 | Co02  | 96.62(8)   |
| Co03  | Co02 | Co01  | 58.369(13) | N2    | Co03 | O0041 | 94.12(7)   |
| Co03  | Co02 | Co011 | 58.369(13) | N2    | Co03 | O004  | 94.12(7)   |
| O0041 | Co02 | Co011 | 43.23(4)   | N2    | Co03 | O006  | 178.69(10) |
| O004  | Co02 | Co01  | 43.23(4)   | N2    | Co03 | O00A1 | 91.71(7)   |
| O0041 | Co02 | Co01  | 87.20(4)   | N2    | Co03 | O00A  | 91.71(7)   |
| O004  | Co02 | Co011 | 87.20(4)   | Co021 | O004 | Co01  | 92.72(6)   |
| O0041 | Co02 | Co03  | 40.52(4)   | Co031 | O004 | Co01  | 93.36(6)   |
| O004  | Co02 | Co03  | 40.52(4)   | Co031 | O004 | Co021 | 98.28(7)   |
| O004  | Co02 | O0041 | 81.01(9)   | Co01  | O005 | Co011 | 98.61(9)   |
| O005  | Co02 | Co011 | 43.59(4)   | Co02  | O005 | Co011 | 92.69(7)   |
| O005  | Co02 | Co01  | 43.59(4)   | Co02  | O005 | Co01  | 92.69(7)   |
| O005  | Co02 | Co03  | 83.80(6)   | Co01  | O006 | Co011 | 97.68(10)  |
| O005  | Co02 | O0041 | 86.14(6)   | Co03  | O006 | Co01  | 91.78(7)   |
| O005  | Co02 | O004  | 86.14(6)   | Co03  | O006 | Co011 | 91.78(7)   |
| O008  | Co02 | Co01  | 83.34(4)   | C00E  | O007 | Co01  | 122.51(14) |
| O008  | Co02 | Co011 | 131.87(5)  | C00E  | O008 | Co021 | 121.39(14) |
| O0081 | Co02 | Co01  | 131.87(5)  | C00F  | O009 | Co011 | 122.34(15) |
| O0081 | Co02 | Co011 | 83.34(4)   | C00F  | O00A | Co03  | 122.17(15) |
| O008  | Co02 | Co03  | 130.95(5)  | C00J1 | N00B | Co02  | 121.36(13) |
| O0081 | Co02 | Co03  | 130.95(5)  | C00J  | N00B | Co02  | 121.36(13) |
| O0081 | Co02 | O0041 | 90.78(6)   | C00J1 | N00B | C00J  | 117.2(3)   |
| O008  | Co02 | O004  | 90.78(6)   | O008  | C00E | O007  | 128.2(2)   |
| O0081 | Co02 | O004  | 170.36(6)  | C00L  | C00E | O007  | 115.4(2)   |
| O008  | Co02 | O0041 | 170.36(6)  | C00L  | C00E | O008  | 116.4(2)   |
| O0081 | Co02 | O005  | 88.29(6)   | O00A  | C00F | O009  | 127.6(2)   |
| O008  | Co02 | O005  | 88.29(6)   | C00N  | C00F | O009  | 116.1(2)   |
| O008  | Co02 | O0081 | 96.92(9)   | C00N  | C00F | O00A  | 116.3(2)   |
| N00B  | Co02 | Co01  | 136.36(5)  | C00O1 | C00H | C00O  | 118.3(3)   |
| N00B  | Co02 | Co011 | 136.36(5)  | C00M  | C00I | N00G  | 179.9(5)   |
| N00B  | Co02 | Co03  | 96.12(7)   | C00O  | C00J | N00B  | 123.1(2)   |
| N00B  | Co02 | O004  | 93.80(7)   | N00E  | C00K | C00Q  | 122.7(3)   |
| N00B  | Co02 | O0041 | 93.80(7)   | C00J  | C00O | C00H  | 119.2(2)   |
| N00B  | Co02 | O005  | 179.92(10) | C00T  | C00Q | C00K  | 121.3(6)   |
| N00B  | Co02 | O0081 | 91.76(7)   | C00U  | C00Q | C00K  | 115.8(5)   |
| N00B  | Co02 | O008  | 91.76(7)   | C00U  | C00Q | C00T  | 18.1(6)    |
| Co01  | Co03 | Co011 | 63.225(17) | N00E  | C00R | C00W  | 122.6(9)   |
| Co02  | Co03 | Co01  | 58.525(13) | C00W  | C00T | C00Q  | 117.7(9)   |

| Atom | Atom | Atom | Angle/°    |
|------|------|------|------------|
| C00T | C00W | C00R | 118.9(8)   |
| C00K | N00E | Co01 | 122.48(18) |
| C00R | N00E | Co01 | 120.7(5)   |
| C00R | N00E | C00K | 115.6(5)   |
| C4   | N00E | Co01 | 117.0(4)   |
| C4   | N00E | C00K | 119.9(4)   |
| C4   | N00E | C00R | 19.9(5)    |
| C00X | C4   | N00E | 120.7(7)   |
| C00U | C00X | C4   | 119.0(7)   |
| C00X | C00U | C00Q | 121.3(7)   |
| C3   | N2   | Co03 | 119.3(6)   |
| C31  | N2   | Co03 | 119.3(6)   |
| C31  | N2   | C3   | 115.9(14)  |
| C71  | N2   | Co03 | 121.5(6)   |
| C7   | N2   | Co03 | 121.5(6)   |
| C71  | N2   | C31  | 119.1(8)   |
| C7   | N2   | C31  | 20.4(12)   |
| C71  | N2   | C3   | 20.4(12)   |
| C7   | N2   | C3   | 119.1(8)   |
| C71  | N2   | C7   | 114.2(12)  |
| C3a  | N2   | Co03 | 130.4(7)   |
| C3a1 | N2   | Co03 | 130.4(7)   |
| C3a  | N2   | C31  | 104.5(7)   |
| C3a1 | N2   | C31  | 11.6(11)   |
| C3a1 | N2   | C3   | 104.5(7)   |
| C3a  | N2   | C3   | 11.6(11)   |
| C3a1 | N2   | C7   | 24.0(10)   |
| C3a  | N2   | C71  | 24.0(10)   |
| C3a  | N2   | C7   | 107.7(8)   |
| C3a1 | N2   | C71  | 107.7(8)   |
| C3a1 | N2   | C3a  | 93.0(14)   |

| Atom | Atom | Atom | Angle/°   |
|------|------|------|-----------|
| C7a1 | N2   | Co03 | 112.4(6)  |
| C7a  | N2   | Co03 | 112.4(6)  |
| C7a  | N2   | C31  | 23.8(10)  |
| C7a1 | N2   | C31  | 128.3(8)  |
| C7a  | N2   | C3   | 128.3(8)  |
| C7a1 | N2   | C3   | 23.8(10)  |
| C7a1 | N2   | C71  | 9.3(10)   |
| C7a1 | N2   | C7   | 122.2(6)  |
| C7a  | N2   | C71  | 122.2(6)  |
| C7a  | N2   | C7   | 9.3(10)   |
| C7a  | N2   | C3a  | 117.0(9)  |
| C7a1 | N2   | C3a1 | 117.0(9)  |
| C7a  | N2   | C3a1 | 30.7(11)  |
| C7a1 | N2   | C3a  | 30.7(11)  |
| C7a1 | N2   | C7a  | 129.7(13) |
| C1   | C3   | N21  | 121.0(11) |
| C51  | C1   | C3   | 120.7(11) |
| C1   | C5   | C11  | 113.6(15) |
| C6   | C5   | C11  | 21.4(8)   |
| C61  | C5   | C1   | 21.4(8)   |
| C6   | C5   | C1   | 119.5(13) |
| C61  | C5   | C11  | 119.5(13) |
| C61  | C5   | C6   | 116.6(17) |
| C7   | C6   | C5   | 118.0(13) |
| C6   | C7   | N2   | 121.7(12) |
| C1a  | C3a  | N21  | 123.5(12) |
| C5a  | C1a  | C3a  | 122.4(11) |
| C6a  | C5a  | C1a  | 119.9(10) |
| C7a  | C6a  | C5a  | 119.5(11) |
| C6a  | C7a  | N2   | 117.6(11) |

**Table S15.** Torsion Angles in ° for Co<sub>4</sub>O<sub>4</sub>OAc<sub>4</sub>Py<sub>4</sub>.

| Atom  | Atom | Atom  | Atom  | Angle/°     |
|-------|------|-------|-------|-------------|
| Co01  | O007 | C00E  | O008  | -0.50(17)   |
| Co01  | O007 | C00E  | C00L  | 179.56(17)  |
| Co011 | O009 | C00F  | O00A  | -7.78(17)   |
| Co011 | O009 | C00F  | C00N  | 171.68(16)  |
| Co01  | N00E | C00K  | C00Q  | -180.0(2)   |
| Co01  | N00E | C00R  | C00W  | 174.4(6)    |
| Co01  | N00E | C4    | C00X  | -177.6(5)   |
| Co02  | O008 | C00E  | O007  | -6.16(17)   |
| Co021 | O008 | C00E  | O007  | -6.16(17)   |
| Co02  | O008 | C00E  | C00L  | 173.78(17)  |
| Co021 | O008 | C00E  | C00L  | 173.78(17)  |
| Co02  | N00B | C00J1 | C00O1 | 176.0(2)    |
| Co02  | N00B | C00J  | C00O  | -176.0(2)   |
| Co03  | O00A | C00F  | O009  | 2.37(17)    |
| Co031 | O00A | C00F  | O009  | 2.37(17)    |
| Co03  | O00A | C00F  | C00N  | -177.08(16) |
| Co031 | O00A | C00F  | C00N  | -177.08(16) |
| Co03  | N2   | C3    | C1    | 173.4(9)    |
| Co03  | N2   | C31   | C11   | -173.4(9)   |
| Co03  | N2   | C7    | C6    | -174.3(9)   |
| Co03  | N2   | C71   | C61   | 174.3(9)    |
| Co03  | N2   | C3a1  | C1a1  | -177.0(12)  |
| Co03  | N2   | C3a   | C1a   | 177.0(12)   |
| Co03  | N2   | C7a   | C6a   | -178.1(9)   |
| Co03  | N2   | C7a1  | C6a1  | 178.1(9)    |
| N00B  | C00J | C00O  | C00H  | -1.1(4)     |
| N00B1 | C00J | C00O  | C00H  | -1.1(4)     |
| C00K  | C00Q | C00T  | C00W  | -7.9(7)     |
| C00K  | C00Q | C00U  | C00X  | -0.5(6)     |
| C00K  | N00E | C00R  | C00W  | 6.6(6)      |
| C00K  | N00E | C4    | C00X  | -6.7(6)     |
| C00Q  | C00T | C00W  | C00R  | 2.3(11)     |
| C00Q  | C00U | C00X  | C4    | 3.1(10)     |
| C00R  | N00E | C4    | C00X  | 76(2)       |
| N00E  | C4   | C00X  | C00U  | 0.4(9)      |
| N2    | C3   | C1    | C51   | 2(3)        |
| N2    | C31  | C11   | C5    | -2(3)       |
| N21   | C7   | C6    | C5    | 0.3(18)     |
| N2    | C7   | C6    | C5    | 0.3(18)     |
| N2    | C3a  | C1a   | C5a   | -2(2)       |
| N21   | C3a  | C1a   | C5a   | -2(2)       |
| N21   | C7a  | C6a   | C5a   | 2.5(18)     |
| N2    | C7a  | C6a   | C5a   | 2.5(18)     |
| C3    | C1   | C51   | C11   | -22.4(10)   |
| C3    | C1   | C51   | C6    | 0.7(13)     |
| C3    | C1   | C51   | C61   | 89(4)       |
| C11   | C5   | C6    | C7    | 78(3)       |
| C1    | C51  | C6    | C7    | -2(2)       |
| C3a   | C1a  | C5a   | C6a   | 1.5(17)     |
| C1a   | C5a  | C6a   | C7a   | -1.7(17)    |

**Table S16.** Hydrogen Fractional Atomic Coordinates ( $\times 10^4$ ) and Equivalent Isotropic Displacement Parameters ( $\text{\AA}^2 \times 10^3$ ) for  $\text{Co}_4\text{O}_4\text{OAc}_4\text{Py}_4$ .  $U_{eq}$  is defined as 1/3 of the trace of the orthogonalised  $U_{ij}$ .

| Atom | x          | y           | z           | Ueq      |
|------|------------|-------------|-------------|----------|
| H00H | 2086.6(19) | 1735(2)     | 5000        | 56.0(9)  |
| H00J | 2664.9(15) | 4133.3(17)  | 3549.2(18)  | 61.8(7)  |
| H00K | 2180.0(16) | 9246.1(16)  | 6443.5(19)  | 64.1(8)  |
| H00a | 4181(9)    | 6213(4)     | 8119(9)     | 86.0(10) |
| H00b | 3876(5)    | 5141(11)    | 8074(9)     | 86.0(10) |
| H00c | 4521(4)    | 5421(14)    | 7412(2)     | 86.0(10) |
| H00i | 5517(12)   | 5941(3)     | 4544(19)    | 83.9(14) |
| H00l | 5263(17)   | 5965(3)     | 5669(5)     | 83.9(14) |
| H00m | 4722(6)    | 6016(3)     | 4790(20)    | 83.9(14) |
| H00d | 1040.8(14) | 8085.3(18)  | 1923(2)     | 84.4(10) |
| H00e | 533.5(14)  | 7217.5(18)  | 2186(2)     | 84.4(10) |
| H00f | 493.7(14)  | 8211.8(18)  | 2789(2)     | 84.4(10) |
| H00O | 2264.2(17) | 2563.8(18)  | 3511(2)     | 70.4(9)  |
| H00Q | 2651.7(19) | 10738.6(19) | 6809(2)     | 80.6(9)  |
| H00g | 2652.0(19) | 10797.6(19) | 6609(2)     | 80.6(9)  |
| H00R | 3983(5)    | 8202(8)     | 5813(8)     | 65(2)    |
| H00T | 3731(6)    | 11072(8)    | 6337(9)     | 83(2)    |
| H00W | 4448(5)    | 9750(6)     | 5908(8)     | 79(2)    |
| H4   | 4009(5)    | 8036(6)     | 6277(7)     | 70(2)    |
| H00X | 4534(4)    | 9525(5)     | 6565(8)     | 89(2)    |
| H00U | 3876(5)    | 10903(7)    | 6674(8)     | 86(2)    |
| H3   | 964(9)     | 5211(11)    | 6422(10)    | 50(2)    |
| H1   | 279(6)     | 3839(8)     | 6432(8)     | 45(2)    |
| H5   | 104(11)    | 2972(14)    | 5009.703133 | 43(3)    |
| H6   | 636(8)     | 3463(11)    | 3539(10)    | 52(2)    |
| H7   | 1293(9)    | 4872(10)    | 3560(10)    | 50(2)    |
| H3a  | 816(9)     | 5061(12)    | 6314(11)    | 51(3)    |
| H1a  | 246(7)     | 3557(10)    | 6094(10)    | 53(3)    |
| H5a  | 201(6)     | 2855(8)     | 4710(7)     | 37(3)    |
| H6a  | 797(7)     | 3523(10)    | 3302(10)    | 50(2)    |
| H7a  | 1371(9)    | 5025(11)    | 3470(11)    | 50(2)    |

**Table S17.** Atomic Occupancies for all atoms that are not fully occupied in  $\text{Co}_4\text{O}_4\text{OAc}_4\text{Py}_4$ .

| Atom | Occupancy | Atom | Occupancy |
|------|-----------|------|-----------|
| H00K | 0.545(14) | C7   | 0.250000  |
| H00i | 0.500000  | H7   | 0.250000  |
| H00l | 0.500000  | C3a  | 0.250000  |
| H00m | 0.500000  | H3a  | 0.250000  |
| H00Q | 0.455(14) | C1a  | 0.250000  |
| H00g | 0.545(14) | H1a  | 0.250000  |
| C00R | 0.455(14) | C5a  | 0.250000  |
| H00R | 0.455(14) | H5a  | 0.250000  |
| C00T | 0.455(14) | C6a  | 0.250000  |
| H00T | 0.455(14) | H6a  | 0.250000  |
| C00W | 0.455(14) | C7a  | 0.250000  |
| H00W | 0.455(14) | H7a  | 0.250000  |
| C4   | 0.545(14) |      |           |
| H4   | 0.545(14) |      |           |
| C00X | 0.545(14) |      |           |
| H00X | 0.545(14) |      |           |
| C00U | 0.545(14) |      |           |
| H00U | 0.545(14) |      |           |
| C3   | 0.250000  |      |           |
| H3   | 0.250000  |      |           |
| C1   | 0.250000  |      |           |
| H1   | 0.250000  |      |           |
| C5   | 0.250000  |      |           |
| H5   | 0.250000  |      |           |
| C6   | 0.250000  |      |           |
| H6   | 0.250000  |      |           |

---

**Table S18.** Solvent masking (PLATON/SQUEEZE) information for  $\text{Co}_4\text{O}_4\text{OAc}_4\text{Py}_4$ .

---

| No | x     | y     | z     | V     | e    | Content |
|----|-------|-------|-------|-------|------|---------|
| 1  | 0.000 | 0.000 | 0.500 | 107.9 | 33.0 | 2MeCN   |
| 2  | 0.500 | 0.500 | 0.000 | 107.9 | 33.0 | 2MeCN   |



## 8. References

- 1 R. K. Harris, E. D. Becker, S. M. Cabral de Menezes, R. Goodfellow and P. Granger, *Pure Appl. Chem.*, 2001, **73**, 1795–1818.
- 2 R. K. Harris, E. D. Becker, S. M. Cabral de Menezes, P. Granger, R. E. Hoffman and K. W. Zilm, *Pure Appl. Chem.*, 2008, **80**, 59–84.
- 3 R. Chakrabarty, S. J. Bora and B. K. Das, *Inorg. Chem.*, 2007, **46**, 9450–9462.
- 4 A. I. Nguyen, K. M. Van Allsburg, M. W. Terban, M. Bajdich, J. Oktawiec, J. Amtawong, M. S. Ziegler, J. P. Dombrowski, K. V. Lakshmi, W. S. Drisdell, J. Yano, S. J. L. Billinge and T. D. Tilley, *Proc. Natl. Acad. Sci.*, 2019, **116**, 201815013.
- 5 A. Yamasaki, *J. Coord. Chem.*, 1991, **24**, 211–260.
- 6 WSolid1 ver. 1.20.20, K.Eichele, 2013.
- 7 D. Massiot, F. Fayon, M. Capron, I. King, S. Le Calvé, B. Alonso, J.-O. Durand, B. Bujoli, Z. Gan and G. Hoatson, *Magn. Reson. Chem.*, 2002, **40**, 70–76.
- 8 S. G. J. van Meerten, W. M. J. Franssen and A. P. M. Kentgens, *J. Magn. Reson.*, 2019, **301**, 56–66.
- 9 V. N. Staroverov, G. E. Scuseria, J. Tao and J. P. Perdew, *J. Chem. Phys.*, 2003, **119**, 12129–12137.
- 10 J.-D. Chai and M. Head-Gordon, *Phys. Chem. Chem. Phys.*, 2008, **10**, 6615.
- 11 F. Weigend and R. Ahlrichs, *Phys. Chem. Chem. Phys.*, 2005, **7**, 3297.
- 12 J. K. Beattie, T. W. Hambley, J. A. Klepetko, A. F. Masters and P. Turner, *Polyhedron*, 1998, **17**, 1343–1354.
- 13 I. G. Shenderovich, *J. Chem. Phys.*, 2018, **148**, 124313.
- 14 M. J. Duer, Ed., *Solid-State NMR Spectroscopy Principles and Applications*, Wiley, 2001.
- 15 D. L. Bryce, G. M. Bernard, M. Gee, M. D. Lumsden, K. Eichele and R. E. Wasylshen, *Can. J. Anal. Sci. Spectrosc.*, 2001, **46**, 46–82.
- 16 I. G. Shenderovich and H.-H. Limbach, *Solids*, 2021, **2**, 139–154.
- 17 I. G. Shenderovich, *J. Phys. Chem. A*, 2023, **127**, 5547–5555.
- 18 I. G. Shenderovich, *ChemPhysChem*, DOI:10.1002/cphc.202300986.
- 19 I. Hung, P. Gor'kov and Z. Gan, *J. Chem. Phys.*, DOI:10.1063/1.5126599.
- 20 A. P. M. Kentgens, *Geoderma*, 1997, **80**, 271–306.
- 21 P. Granger, in *Encyclopedia of Magnetic Resonance*, John Wiley & Sons, Ltd, Chichester, UK, 2007.
- 22 B. P. Tatman, H. Modha and S. P. Brown, *J. Magn. Reson.*, 2023, **352**, 107459.
- 23 M. Schwarze, M. Schröder, D. Stellmach, K. Kailasam, A. Thomas and R. Schomäcker, *Chemie Ing. Tech.*, 2013, **85**, 500–507.
- 24 M. Schwarze, D. Stellmach, M. Schröder, K. Kailasam, R. Reske, A. Thomas and R. Schomäcker, *Phys. Chem. Chem. Phys.*, 2013, **15**, 3466.
- 25 N. S. McCool, D. M. Robinson, J. E. Sheats and G. C. Dismukes, *J. Am. Chem. Soc.*, 2011, **133**, 11446–11449.
- 26 A. Genoni, G. La Ganga, A. Volpe, F. Puntoriero, M. Di Valentin, M. Bonchio, M. Natali and A. Sartorel, *Faraday Discuss.*, 2015, **185**, 121–141.
- 27 S. Berardi, G. La Ganga, M. Natali, I. Bazzan, F. Puntoriero, A. Sartorel, F. Scandola, S. Campagna and M. Bonchio, *J. Am. Chem. Soc.*, 2012, **134**, 11104–11107.
- 28 P. F. Smith, C. Kaplan, J. E. Sheats, D. M. Robinson, N. S. McCool, N. Mezle and G. C. Dismukes, *Inorg. Chem.*, 2014, **53**, 2113–2121.
- 29 S. R. Chaudhari, D. Wissler, A. C. Pinon, P. Berruyer, D. Gajan, P. Tordo, O. Ouari, C. Reiter, F. Engelke, C. Copéret, M. Lelli, A. Lesage and L. Emsley, *J. Am. Chem. Soc.*, 2017, **139**, 10609–10612.
- 30 F. M. Wissler, M. Duguet, Q. Perrinet, A. C. Ghosh, M. Alves-Favaro, Y. Mohr, C. Lorentz, E. A. Quadrelli, R. Palkovits, D. Farrusseng, C. Mellot-Draznieks, V. Waele and J. Canivet, *Angew. Chemie Int. Ed.*, 2020, **59**, 5116–5122.
- 31 A. I. Nguyen, J. Wang, D. S. Levine, M. S. Ziegler and T. D. Tilley, *Chem. Sci.*, 2017, **8**, 4274–4284.
- 32 G. M. Sheldrick, *Acta Crystallogr. Sect. A Found. Adv.*, 2015, **71**, 3–8.
- 33 O. V. Dolomanov, L. J. Bourhis, R. J. Gildea, J. A. K. Howard and H. Puschmann, *J. Appl. Crystallogr.*, 2009, **42**, 339–341.
- 34 L. J. Bourhis, O. V. Dolomanov, R. J. Gildea, J. A. K. Howard and H. Puschmann, *Acta Crystallogr. Sect. A Found. Adv.*, 2015, **71**, 59–75.
- 35 CrysAlisPro (V43), Rigaku Oxford Diffraction Ltd., 2019.
- 36 F. Kleemiss, O. V. Dolomanov, M. Bodensteiner, N. Peyerimhoff, L. Midgley, L. J. Bourhis, A. Genoni, L. A. Malaspina, D. Jayatilaka, J. L. Spencer, F. White, B. Grundkötter-Stock, S. Steinhauer, D. Lentz, H. Puschmann and S. Grabowsky, *Chem. Sci.*, 2021, **12**, 1675–1692.
